# Supplementary material for: Analysis of Transmission of MRSA and ESBL-E among Pigs and Farm Personnel
Source: PubMed Central journal article supplement (PMC4589321; doi:10.1371/journal.pone.0138173), 2015-09-30
Supplement: pone.0138173.s001.pdf [file pone.0138173.s001.pdf]

**Table S1. MRSA and ESBL-E colonization in pigs (sorted by MRSA prevalence on farms).**

| Farms  | Pig - MRSA |          |       | Pig - ESBL-E |          |       |
|--------|------------|----------|-------|--------------|----------|-------|
|        | negative   | positive | % pos | negative     | positive | % pos |
| B35 FR | 2          | 8        | 80%   | 0            | 7        | 100%  |
| B11 FF | 10         | 9        | 47%   | 20           | 0        | 0%    |
| B12 FF | 11         | 9        | 45%   | 13           | 5        | 28%   |
| B15 FF | 12         | 8        | 40%   | 19           | 1        | 5%    |
| B26 FF | 6          | 4        | 40%   | 10           | 0        | 0%    |
| B28 FF | 6          | 4        | 40%   | 6            | 4        | 40%   |
| B31 NF | 6          | 4        | 40%   | 3            | 7        | 70%   |
| B09 FF | 12         | 6        | 33%   | 12           | 8        | 40%   |
| B10 FF | 13         | 6        | 32%   | 9            | 11       | 55%   |
| B20 FF | 14         | 6        | 30%   | 6            | 14       | 70%   |
| B34 FR | 7          | 3        | 30%   | 6            | 4        | 40%   |
| B06 FR | 15         | 5        | 25%   | 13           | 7        | 35%   |
| B14 FF | 15         | 5        | 25%   | 19           | 1        | 5%    |
| B19 FF | 15         | 5        | 25%   | 6            | 14       | 70%   |
| B02 FF | 16         | 4        | 20%   | 4            | 16       | 80%   |
| B08 FR | 16         | 4        | 20%   | 19           | 0        | 0%    |
| B16 FF | 16         | 4        | 20%   | 20           | 0        | 0%    |
| B18 FF | 16         | 4        | 20%   | 9            | 11       | 55%   |
| B30 FR | 8          | 2        | 20%   | 3            | 7        | 70%   |
| B03 FF | 19         | 2        | 10%   | 20           | 0        | 0%    |
| B04 FR | 18         | 2        | 10%   | 18           | 1        | 5%    |
| B13 FF | 18         | 2        | 10%   | 16           | 1        | 6%    |
| B17 FF | 18         | 2        | 10%   | 19           | 1        | 5%    |
| B24 NF | 9          | 1        | 10%   | 3            | 7        | 70%   |
| B25 FR | 9          | 1        | 10%   | 6            | 4        | 40%   |
| B32 FR | 9          | 1        | 10%   | 10           | 0        | 0%    |
| B33 FR | 9          | 1        | 10%   | 5            | 5        | 50%   |
| B21 FF | 20         | 1        | 5%    | 20           | 0        | 0%    |
| B01 FF | 20         | 0        | 0%    | 6            | 14       | 70%   |
| B05 FF | 10         | 0        | 0%    | 10           | 0        | 0%    |
| B07 FF | 19         | 0        | 0%    | 19           | 1        | 5%    |
| B22 FF | 10         | 0        | 0%    | 4            | 6        | 60%   |
| B23 FF | 10         | 0        | 0%    | 10           | 0        | 0%    |
| B27 FR | 10         | 0        | 0%    | 5            | 5        | 50%   |
| B29 FF | 10         | 0        | 0%    | 9            | 1        | 10%   |

FR = farrowing, NF = nursery, FF = finishing
