# Supplementary material for: Analysis of Transmission of MRSA and ESBL-E among Pigs and Farm Personnel
Source: PubMed Central journal article supplement (PMC4589321; doi:10.1371/journal.pone.0138173), 2015-09-30
Supplement: pone.0138173.s003.pdf [file pone.0138173.s003.pdf]

**Table S3. MRSA colonization in pigs (sorted by age and production step).**

| Farm   | Pigs  |      | Pig - MRSA               |                       | Pig - MRSA               |                       |
|--------|-------|------|--------------------------|-----------------------|--------------------------|-----------------------|
|        | % pos | comp | young far./<br>newly we. | farrowing/<br>nursery | young far./<br>newly we. | farrowing/<br>nursery |
| B35 FR | 80%   | 5    | 3                        | 5                     | 60%                      | 100%                  |
| B34 FR | 30%   | 5    | 1                        | 2                     | 20%                      | 40%                   |
| B06 FR | 25%   | 10   | 2                        | 3                     | 20%                      | 30%                   |
| B08 FR | 20%   | 10   | 1                        | 3                     | 10%                      | 30%                   |
| B30 FR | 20%   | 5    | 1                        | 1                     | 20%                      | 20%                   |
| B04 FR | 10%   | 10   | 0                        | 2                     | 0%                       | 20%                   |
| B25 FR | 10%   | 5    | 0                        | 1                     | 0%                       | 20%                   |
| B32 FR | 10%   | 5    | 0                        | 1                     | 0%                       | 20%                   |
| B33 FR | 10%   | 5    | 0                        | 1                     | 0%                       | 20%                   |
| B27 FR | 0%    | 5    | 0                        | 0                     | 0%                       | 0%                    |
| B31 NF | 40%   | 5    | 4                        | 0                     | 80%                      | 0%                    |
| B24 NF | 10%   | 5    | 0                        | 1                     | 0%                       | 20%                   |
| Farm   | % pos | comp | early<br>finisher        | finisher              | early<br>finisher        | finisher              |
| B11 FF | 47%   | 10   | 8                        | 1                     | 80%                      | 10%                   |
| B12 FF | 45%   | 10   | 5                        | 4                     | 50%                      | 40%                   |
| B15 FF | 40%   | 10   | 8                        | 0                     | 80%                      | 0%                    |
| B26 FF | 40%   | 5    | 3                        | 1                     | 60%                      | 20%                   |
| B28 FF | 40%   | 5    | 4                        | 0                     | 80%                      | 0%                    |
| B09 FF | 33%   | 10   | 6                        | 0                     | 60%                      | 0%                    |
| B10 FF | 32%   | 10   | 6                        | 0                     | 60%                      | 0%                    |
| B20 FF | 30%   | 10   | 4                        | 2                     | 40%                      | 20%                   |
| B14 FF | 25%   | 10   | 2                        | 3                     | 20%                      | 30%                   |
| B19 FF | 25%   | 10   | 5                        | 0                     | 50%                      | 0%                    |
| B02 FF | 20%   | 10   | 3                        | 1                     | 30%                      | 10%                   |
| B16 FF | 20%   | 10   | 4                        | 0                     | 40%                      | 0%                    |
| B18 FF | 20%   | 10   | 3                        | 1                     | 30%                      | 10%                   |
| B03 FF | 10%   | 10   | 1                        | 1                     | 10%                      | 10%                   |
| B13 FF | 10%   | 10   | 1                        | 1                     | 10%                      | 10%                   |
| B17 FF | 10%   | 10   | 0                        | 2                     | 0%                       | 20%                   |
| B21 FF | 5%    | 10   | 1                        | 0                     | 10%                      | 0%                    |
| B01 FF | 0%    | 10   | 0                        | 0                     | 0%                       | 0%                    |
| B05 FF | 0%    | 10   | 0                        | 0                     | 0%                       | 0%                    |
| B07 FF | 0%    | 10   | 0                        | 0                     | 0%                       | 0%                    |
| B22 FF | 0%    | 5    | 0                        | 0                     | 0%                       | 0%                    |
| B23 FF | 0%    | 5    | 0                        | 0                     | 0%                       | 0%                    |
| B29 FF | 0%    | 5    | 0                        | 0                     | 0%                       | 0%                    |

comp = per compartment, FR = farrowing, NF = nursery, FF = finishing  
 young far. = young farrowing piglet, newly we. = newly weaned piglet
