# Supplementary material for: Analysis of Transmission of MRSA and ESBL-E among Pigs and Farm Personnel
Source: PubMed Central journal article supplement (PMC4589321; doi:10.1371/journal.pone.0138173), 2015-09-30
Supplement: pone.0138173.s005.pdf [file pone.0138173.s005.pdf]

**Table S5. MRSA isolates obtained from humans.**

|        | MRSA          |          |          |       |        |
|--------|---------------|----------|----------|-------|--------|
|        | Human samples |          | Positive |       |        |
| Farms  | negative      | positive | Farmer   | Staff | Family |
| B35 FR | 0             | 2        | 0        | 2     | 0      |
| B11 FF | 0             | 2        | 1        | 0     | 1      |
| B12 FF | 0             | 2        | 1        | 0     | 1      |
| B15 FF | 1             | 1        | 1        | 0     | 0      |
| B26 FF | 1             | 1        | 1        | 0     | 0      |
| B28 FF | 2             | 2        | 0        | 1     | 1      |
| B31 NF | 0             | 2        | 1        | 0     | 1      |
| B09 FF | 2             | 2        | 1        | 0     | 1      |
| B10 FF | 1             | 1        | 1        | 0     | 0      |
| B20 FF | 3             | 1        | 1        | 0     | 0      |
| B34 FR | 0             | 1        | 0        | 1     | 0      |
| B06 FR | 1             | 2        | 1        | 1     | 0      |
| B14 FF | 2             | 3        | 1        | 1     | 1      |
| B19 FF | 2             | 1        | 0        | 0     | 1      |
| B02 FF | 1             | 0        | 0        | 0     | 0      |
| B08 FR | 4             | 0        | 0        | 0     | 0      |
| B16 FF | 1             | 2        | 0        | 2     | 0      |
| B18 FF | 2             | 0        | 0        | 0     | 0      |
| B30 FR | 2             | 3        | 1        | 0     | 2      |
| B03 FF | 1             | 0        | 0        | 0     | 0      |
| B04 FR | 1             | 2        | 1        | 0     | 1      |
| B13 FF | 1             | 1        | 1        | 0     | 0      |
| B17 FF | 2             | 0        | 0        | 0     | 0      |
| B24 NF | 1             | 0        | 0        | 0     | 0      |
| B25 FR | 1             | 1        | 1        | 0     | 0      |
| B32 FR | 0             | 3        | 1        | 1     | 1      |
| B33 FR | 0             | 1        | 0        | 1     | 0      |
| B21 FF | 1             | 2        | 1        | 1     | 0      |
| B01 FF | 1             | 0        | 0        | 0     | 0      |
| B05 FF | 1             | 1        | 1        | 0     | 0      |
| B07 FF | 3             | 0        | 0        | 0     | 0      |
| B22 FF | 0             | 2        | 1        | 0     | 1      |
| B23 FF | 3             | 0        | 0        | 0     | 0      |
| B27 FR | 3             | 0        | 0        | 0     | 0      |
| B29 FF | 0             | 1        | 1        | 0     | 0      |

FR = farrowing, NF = nursery, FF = finishing
