# Supplementary material for: Analysis of Transmission of MRSA and ESBL-E among Pigs and Farm Personnel
Source: PubMed Central journal article supplement (PMC4589321; doi:10.1371/journal.pone.0138173), 2015-09-30
Supplement: pone.0138173.s006.pdf [file pone.0138173.s006.pdf]

**Table S6. MRSA und ESBL-E colonization of pigs sampled on farms and abattoirs.**

|        | Farms    |          |       |       |          |          | Abattoirs |    |    |      |    |    |
|--------|----------|----------|-------|-------|----------|----------|-----------|----|----|------|----|----|
|        | ESBL-E   |          |       | MRSA  |          |          | ESBL-E    |    |    | MRSA |    |    |
| Farms  | negative | positive | % pos | % pos | negative | positive | t1        | t2 | t3 | t1   | t2 | t3 |
| B02 FF | 4        | 16       | 80%   | 20%   | 16       | 4        | 2         | 1  | 0  | 0    | 0  | 0  |
| B19 FF | 6        | 14       | 70%   | 25%   | 15       | 5        | 1         | 2  | 0  | 0    | 0  | 0  |
| B18 FF | 9        | 11       | 55%   | 20%   | 16       | 4        | 2         | 2  | 0  | 0    | 0  | 0  |
| B15 FF | 19       | 1        | 5%    | 40%   | 12       | 8        | 0         | 0  | 0  | 0    | 1  | 0  |
| B14 FF | 19       | 1        | 5%    | 25%   | 15       | 5        | 0         | 2  | 0  | 2    | 3  | 0  |
| B16 FF | 20       | 0        | 0%    | 20%   | 16       | 4        | 0         | 3  | 0  | 2    | 1  | 0  |
| B13 FF | 16       | 1        | 6%    | 10%   | 18       | 2        | 0         | 2  | 0  | 2    | 3  | 0  |
| B17 FF | 19       | 1        | 5%    | 10%   | 18       | 2        | 1         | 0  | 0  | 3    | 1  | 0  |
| B29 FF | 9        | 1        | 10%   | 0%    | 10       | 0        | 0         | 0  | 0  | 0    | 2  | 0  |
| B03 FF | 20       | 0        | 0%    | 10%   | 19       | 2        | 0         | 0  | 0  | 0    | 2  | 0  |
| B07 FF | 19       | 1        | 5%    | 0%    | 19       | 0        | 1         | 1  | 0  | 1    | 3  | 0  |
| B21 FF | 20       | 0        | 0%    | 5%    | 20       | 1        | 0         | 0  | 0  | 1    | 3  | 0  |
| B23 FF | 10       | 0        | 0%    | 0%    | 10       | 0        | 0         | 0  | 0  | 2    | 2  | 0  |

t = time point, FF = finishing
