# Supplementary material for: Analysis of Transmission of MRSA and ESBL-E among Pigs and Farm Personnel
Source: PubMed Central journal article supplement (PMC4589321; doi:10.1371/journal.pone.0138173), 2015-09-30
Supplement: pone.0138173.s007.pdf [file pone.0138173.s007.pdf]

**Table S7. MRSA und ESBL-E detection in farm air.**

| <b>Air samples</b> |          |               |          |
|--------------------|----------|---------------|----------|
| <b>MRSA</b>        |          | <b>ESBL-E</b> |          |
| negative           | positive | negative      | positive |
| 0                  | 2        | 2             | 0        |
| 0                  | 2        | 2             | 0        |
| 0                  | 2        | 2             | 0        |
| 0                  | 3        | 1             | 1        |
| 0                  | 2        | 0             | 1        |
| 0                  | 2        | 2             | 0        |
| 1                  | 1        | 2             | 0        |
| 1                  | 1        | 1             | 1        |
| 0                  | 3        | 2             | 0        |
| 0                  | 2        | 1             | 1        |
| 0                  | 2        | 2             | 0        |
| 0                  | 2        | 1             | 1        |
| 0                  | 2        | 2             | 0        |
| 1                  | 1        | 2             | 0        |
| 0                  | 2        | 2             | 0        |
| 0                  | 1        | 2             | 0        |
| 0                  | 2        | 2             | 0        |
| 0                  | 2        | 1             | 1        |
| 1                  | 1        | 2             | 0        |
| 0                  | 2        | 2             | 0        |
| 1                  | 1        | 2             | 0        |
| 0                  | 2        | 2             | 0        |
| 0                  | 2        | 2             | 0        |
| 0                  | 3        | 2             | 0        |
| 0                  | 2        | 2             | 0        |
| 0                  | 2        | 2             | 0        |
| 1                  | 1        | 2             | 0        |
| 1                  | 1        | 2             | 0        |
| 0                  | 2        | 1             | 0        |
| 0                  | 1        | 2             | 0        |
| 1                  | 1        | 2             | 0        |
| 0                  | 2        | 2             | 0        |
| 0                  | 2        | 2             | 0        |
| 2                  | 0        | 1             | 0        |
| 0                  | 1        | 2             | 0        |
