# Supplementary material for: Analysis of Transmission of MRSA and ESBL-E among Pigs and Farm Personnel
Source: PubMed Central journal article supplement (PMC4589321; doi:10.1371/journal.pone.0138173), 2015-09-30
Supplement: pone.0138173.s008.pdf [file pone.0138173.s008.pdf]

**Table S8. MRSA und ESBL-E detection in air on abattoirs.**

| <b>Air samples</b> |               |      |      |      |
|--------------------|---------------|------|------|------|
| Abattoir           | MRSA / ESBL-E | t2   | t3   |      |
| Abattoir A         | MRSA          | +    | -    |      |
|                    |               | +    | -    |      |
|                    |               | +    | -    |      |
|                    |               | +    | -    |      |
|                    |               | -    | -    |      |
|                    |               | +    | -    |      |
|                    | ESBL-E        | -    | -    |      |
|                    |               | -    | -    |      |
|                    |               | +    | -    |      |
|                    |               | +    | -    |      |
|                    |               | +    | -    |      |
|                    | Abattoir B    | MRSA | +    | n.d. |
|                    |               |      | +    | n.d. |
| +                  |               |      | n.d. |      |
| +                  |               |      | n.d. |      |
| +                  |               |      | n.d. |      |
| +                  |               |      | n.d. |      |
| +                  |               |      | n.d. |      |
| +                  |               |      | n.d. |      |
| ESBL-E             |               | +    | n.d. |      |
|                    |               | -    | n.d. |      |
|                    |               | +    | n.d. |      |
|                    |               | +    | n.d. |      |
|                    |               | -    | n.d. |      |
|                    |               | -    | n.d. |      |

t = time point, n.d. = not determined
