# Supplementary material for: Analysis of Transmission of MRSA and ESBL-E among Pigs and Farm Personnel
Source: PubMed Central journal article supplement (PMC4589321; doi:10.1371/journal.pone.0138173), 2015-09-30
Supplement: pone.0138173.s009.pdf [file pone.0138173.s009.pdf]

|      |     |     |    |    |    |    |    |     |     |    |    |    |     |     |     |    |    |    |    |    |    |   |
|------|-----|-----|----|----|----|----|----|-----|-----|----|----|----|-----|-----|-----|----|----|----|----|----|----|---|
| B08  | 2   |     |    |    |    |    |    |     |     |    |    |    |     | 1   |     |    |    |    |    |    |    | 3 |
| B33  | 1   |     |    |    |    |    |    | 1   |     |    |    |    |     | 1   |     |    |    |    |    |    |    | 3 |
| B17  |     |     |    |    |    | 1  |    |     |     |    |    |    |     |     |     |    |    |    |    |    | 2  | 3 |
| B18  | 1   |     |    |    |    |    |    |     |     |    |    |    |     |     |     |    |    |    | 1  |    |    | 2 |
| B01  |     |     |    |    |    |    |    |     |     |    |    |    |     | 1   |     | 1  |    |    |    |    |    | 2 |
| B29  |     |     |    |    |    |    |    | 1   |     |    |    |    |     | 1   |     |    |    |    |    |    |    | 2 |
| B23  |     |     |    |    |    |    |    |     |     |    |    |    |     | 1   | 1   |    |    |    |    |    |    | 2 |
| B05  |     |     |    |    |    |    |    | 1   |     |    |    |    |     | 1   |     |    |    |    |    |    |    | 2 |
| B07  |     |     |    |    |    |    |    |     |     |    |    |    |     | 1   |     |    |    |    |    |    |    | 1 |
| Σ    | 30  | 9   | 3  | 1  | 2  | 1  | 1  | 31  | 6   | 3  | 1  | 1  | 34  | 13  | 6   | 1  | 1  | 1  | 1  | 1  | 2  |   |
| in % | 64% | 19% | 6% | 2% | 4% | 2% | 2% | 74% | 14% | 7% | 2% | 2% | 58% | 22% | 10% | 2% | 2% | 2% | 2% | 2% | 3% |   |
