# Supplementary material for: Analysis of Transmission of MRSA and ESBL-E among Pigs and Farm Personnel
Source: PubMed Central journal article supplement (PMC4589321; doi:10.1371/journal.pone.0138173), 2015-09-30
Supplement: pone.0138173.s010.pdf [file pone.0138173.s010.pdf]

**Table S10. MRSA and ESBL-E colonization in pigs and the use of classes of antibiotics on individual farms.**

| Farms  | Pig - MRSA |          | Pig - ESBL-E |          | antibiotics                                      |
|--------|------------|----------|--------------|----------|--------------------------------------------------|
|        | % positive | category | % positive   | category | classes                                          |
| B01 FF | 0%         | A        | 70%          | D        | Betalactams, Tetracyclines                       |
| B02 FF | 20%        | B        | 80%          | D        | Betalactams                                      |
| B03 FF | 10%        | B        | 0%           | A        | Tetracyclines                                    |
| B04 FR | 10%        | B        | 5%           | B        | Betalactams                                      |
| B05 FF | 0%         | A        | 0%           | A        | Chloramphenicol                                  |
| B06 FR | 25%        | C        | 35%          | C        | Betalactams, Tetracyclines                       |
| B07 FF | 0%         | A        | 5%           | B        | Betalactams, Tetracyclines                       |
| B08 FR | 20%        | B        | 0%           | A        |                                                  |
| B09 FF | 33%        | C        | 40%          | C        | Tetracyclines, Sulfonamides                      |
| B10 FF | 32%        | C        | 55%          | D        | Betalactams                                      |
| B11 FF | 47%        | C        | 0%           | A        | Betalactams, Tetracyclines, Sulfonamides         |
| B12 FF | 45%        | C        | 28%          | C        | Betalactams, Tetracyclines, Sulfonamides         |
| B13 FF | 10%        | B        | 6%           | B        | Betalactams, Tetracyclines, Colistin             |
| B14 FF | 25%        | C        | 5%           | B        | Betalactams, Tetracyclines, Macrolides, Colistin |
| B15 FF | 40%        | C        | 5%           | B        | Betalactams, Tetracyclines                       |
| B16 FF | 20%        | B        | 0%           | A        | Betalactams, Tetracyclines                       |
| B17 FF | 10%        | B        | 5%           | B        | Betalactams                                      |
| B18 FF | 20%        | B        | 55%          | D        | Betalactams                                      |
| B19 FF | 25%        | C        | 70%          | D        | Betalactams                                      |
| B20 FF | 30%        | C        | 70%          | D        | Betalactams, Tetracyclines, Lincosamides         |
| B21 FF | 5%         | B        | 0%           | A        | Betalactams, Tetracyclines, Sulfonamides         |
| B22 FF | 0%         | A        | 60%          | D        | Tetracyclines, Sulfonamides                      |
| B23 FF | 0%         | A        | 0%           | A        | Betalactams, Tetracyclines                       |
| B24 NF | 10%        | B        | 70%          | D        | Tetracyclines, Sulfonamides                      |
| B25 FR | 10%        | B        | 40%          | C        |                                                  |

|        |     |   |      |   |                                                                  |
|--------|-----|---|------|---|------------------------------------------------------------------|
| B26 FF | 40% | C | 0%   | A | Betalactams, Tetracyclines, Sulfonamides                         |
| B27 FR | 0%  | A | 50%  | C | Betalactams, Quinolones                                          |
| B28 FF | 40% | C | 40%  | C | Tetracyclines                                                    |
| B29 FF | 0%  | A | 10%  | B | Tetracyclines, Macrolides                                        |
| B30 FR | 20% | B | 70%  | D | Betalactams, Quinolones, Tetracyclines                           |
| B31 NF | 40% | C | 70%  | D | Betalactams, Tetracyclines, Colistin                             |
| B32 FR | 10% | B | 0%   | A | Betalactams, Quinolones, Tetracyclines, Macrolides, Sulfonamides |
| B33 FR | 10% | B | 50%  | C | Betalactams, Tetracyclines, Sulfonamides                         |
| B34 FR | 30% | C | 40%  | C | Tetracyclines, Macrolides                                        |
| B35 FR | 80% | D | 100% | D | Tetracyclines, Macrolides, Colistin                              |

FR = farrowing, NF = nursery, FF = finishing
